# Supplementary material
Source: PubMed Central journal article supplement (PMC7384798)
Supplement: mmc1.pdf [file mmc1.pdf]

# THE LANCET

## Supplementary appendix

This appendix formed part of the original submission. We post it as supplied by the authors.

Supplement to: Headey D, Heidkamp R, Osendarp S, et al. Impacts of COVID-19 on childhood malnutrition and nutrition-related mortality. *Lancet* 2020; published online July 27. [http://dx.doi.org/10.1016/S0140-6736\(20\)31647-0](http://dx.doi.org/10.1016/S0140-6736(20)31647-0).

**Members of the Standing Together for Nutrition consortium**

| <b>Name</b>           | <b>Affiliation</b>                                       |
|-----------------------|----------------------------------------------------------|
| Agnes Quisumbing      | International Food Policy Research Institute (IFPRI)     |
| Anna Herforth         | Independent                                              |
| Anna Larrey           | Food and Agricultural Organization (FAO)                 |
| Augustin Flory        | Research for Development (R4D)                           |
| Carol Levin           | Department of Global Health, University of Washington    |
| Cheikh Mbacké Faye    | African Population and Health Research Centre            |
| Chika Hayashi         | United Nations Children's Fund (UNICEF)                  |
| Chytanya Kompala      | Eleanor Crook Foundation                                 |
| Corinna Hawkes        | Centre for Food Policy, City, University of London       |
| David Laborde         | International Food Policy Research Institute (IFPRI)     |
| Derek Headey          | International Food Policy Research Institute (IFPRI)     |
| Ellen Piwoz           | Independent                                              |
| Emorn Udomkesmalee    | Institute of Nutrition, Mahidol University               |
| Gilles Bergeron       | New York Academy of Sciences (NYAS)                      |
| Habtamu Fekadu        | Save The Children                                        |
| Howarth Bouis         | International Food Policy Research Institute (IFPRI)     |
| Inge D. Brouwer       | Wageningen University & Research (WUR)                   |
| Jessica Fanzo         | John Hopkins Bloomberg School of Public Health           |
| Jonathan Kweku Akuoku | World Bank (WB)                                          |
| Juan D. Rivera        | Instituto Nacional de Salud Pública                      |
| Kenneth H. Brown      | Department of Nutrition, University of California, Davis |
| Lawrence Haddad       | Global Alliance for Improved Nutrition (GAIN)            |
| Lynnette Neufeld      | Global Alliance for Improved Nutrition (GAIN)            |
| Mandana Arabi         | Nutrition International                                  |
| Marcus Glassman       | Eleanor Crook Foundation                                 |
| Marie Ruel            | International Food Policy Research Institute (IFPRI)     |
| Meera Shekar          | World Bank (WB)                                          |
| Namukolo Covic        | International Food Policy Research Institute (IFPRI)     |
| Neff Walker           | John Hopkins Bloomberg School of Public Health           |
| Ngozi Nnam            | University of Nigeria                                    |
| Nichola Connell       | Eleanor Crook Foundation                                 |
| Nick Scott            | Burnet Institute                                         |
| Purnima Menon         | International Food Policy Research Institute (IFPRI)     |
| Rahul Rawat           | Bill and Melinda Gates Foundation (BMGF)                 |
| Rebecca Heidkamp      | John Hopkins Bloomberg School of Public Health           |
| Robert Black          | John Hopkins Bloomberg School of Public Health           |
| Rina Agustina         | University of Indonesia                                  |

**Members of the Standing Together for Nutrition consortium**

|                    |                                                                                                                                                                                                                    |
|--------------------|--------------------------------------------------------------------------------------------------------------------------------------------------------------------------------------------------------------------|
| Rolf Klemm         | Helen Keller International (HKI)                                                                                                                                                                                   |
| Saskia DePee       | World Food Programme (WFP)                                                                                                                                                                                         |
| Saskia Osendarp    | Micronutrient Forum (MNF)                                                                                                                                                                                          |
| Shweta Khandelwal  | Public Health Foundation of India                                                                                                                                                                                  |
| Victor Aguayo      | United Nations Children's Fund (UNICEF)                                                                                                                                                                            |
| Zulfiqar A. Bhutta | Centre for Global Child Health, The Hospital for Sick Children (Sick Kids), Toronto, Canada & Institute for Global Health & Development, The Aga Khan University, South-Central Asia, East Africa & United Kingdom |
